# Supplementary material
Source: PubMed Central journal article supplement (PMC1994707)

**A**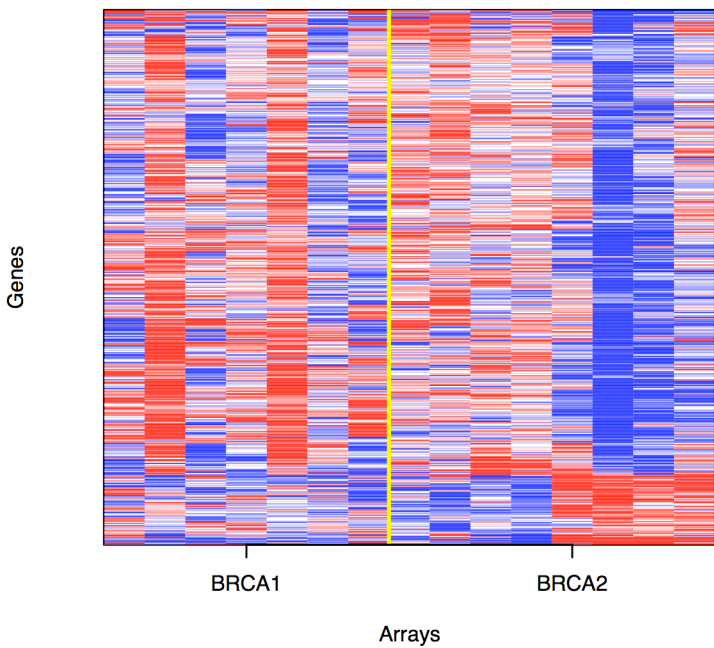**B**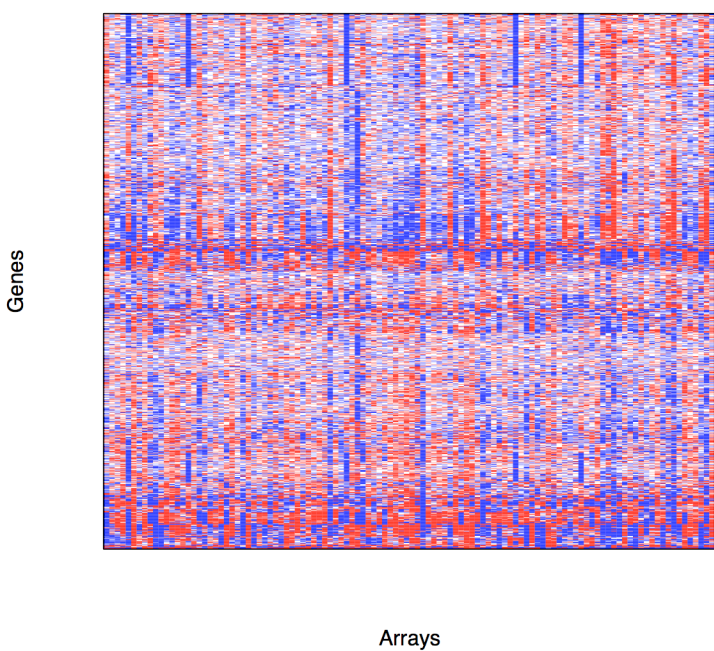**C**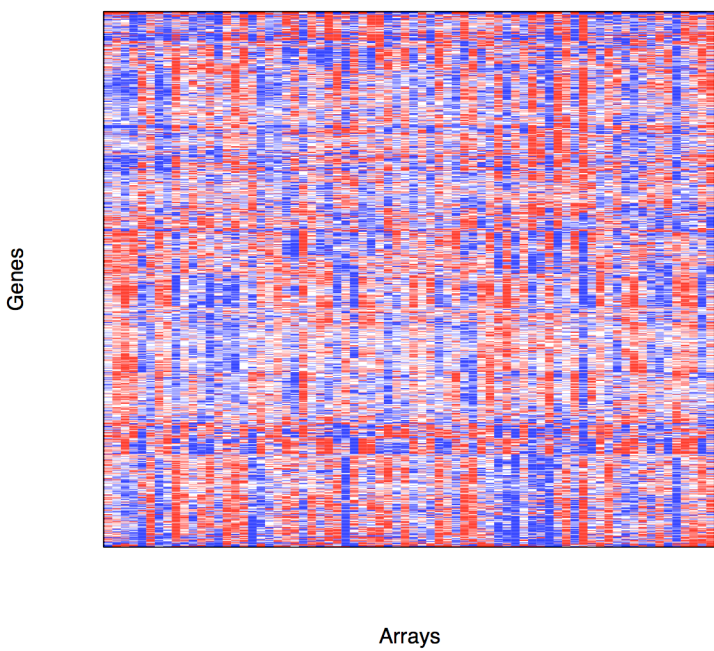

Supplement: pgen.0030161.sg001.pdf [file pgen.0030161.sg001.pdf]

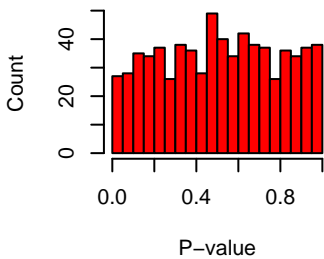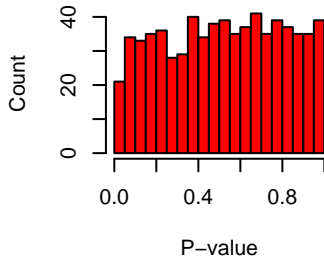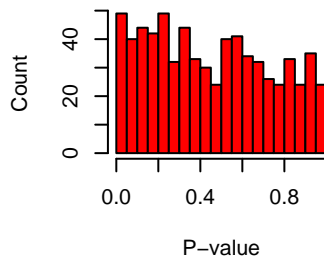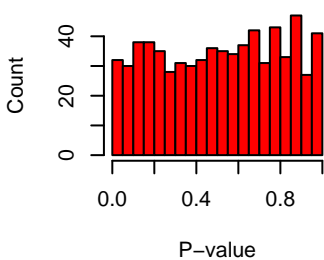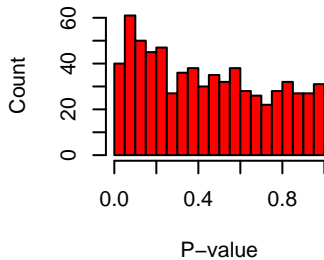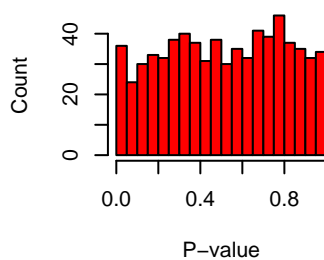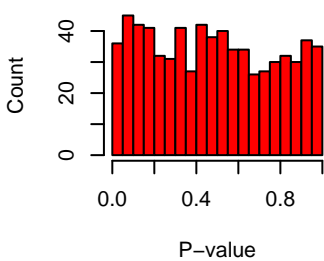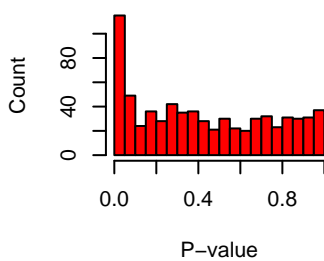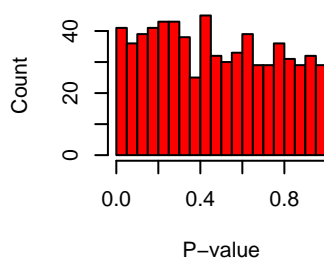

Supplement: pgen.0030161.sg002.pdf [file pgen.0030161.sg002.pdf]

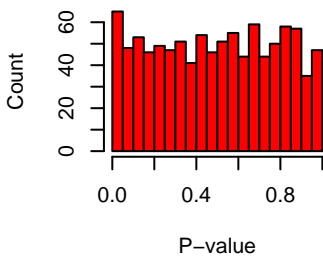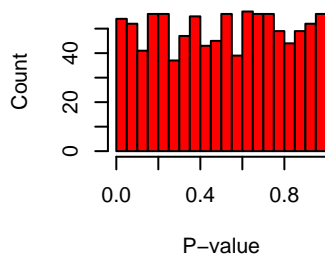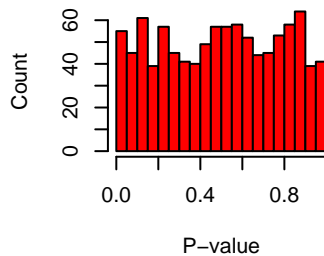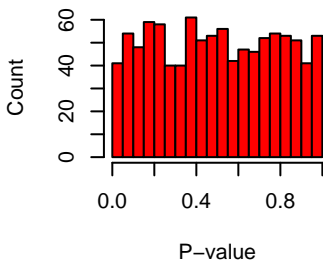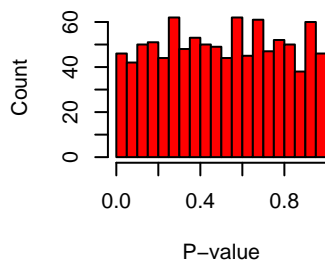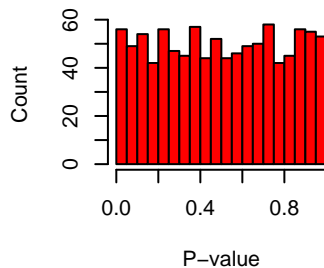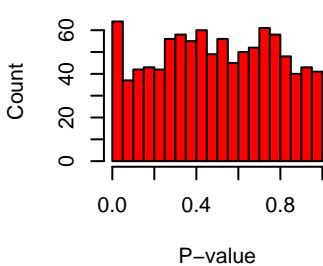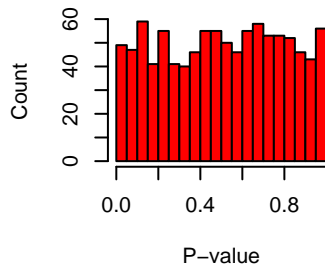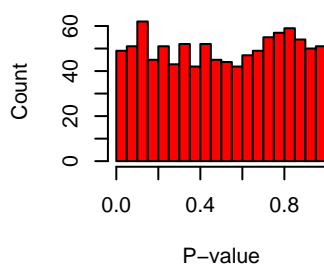

Supplement: pgen.0030161.sg003.pdf [file pgen.0030161.sg003.pdf]

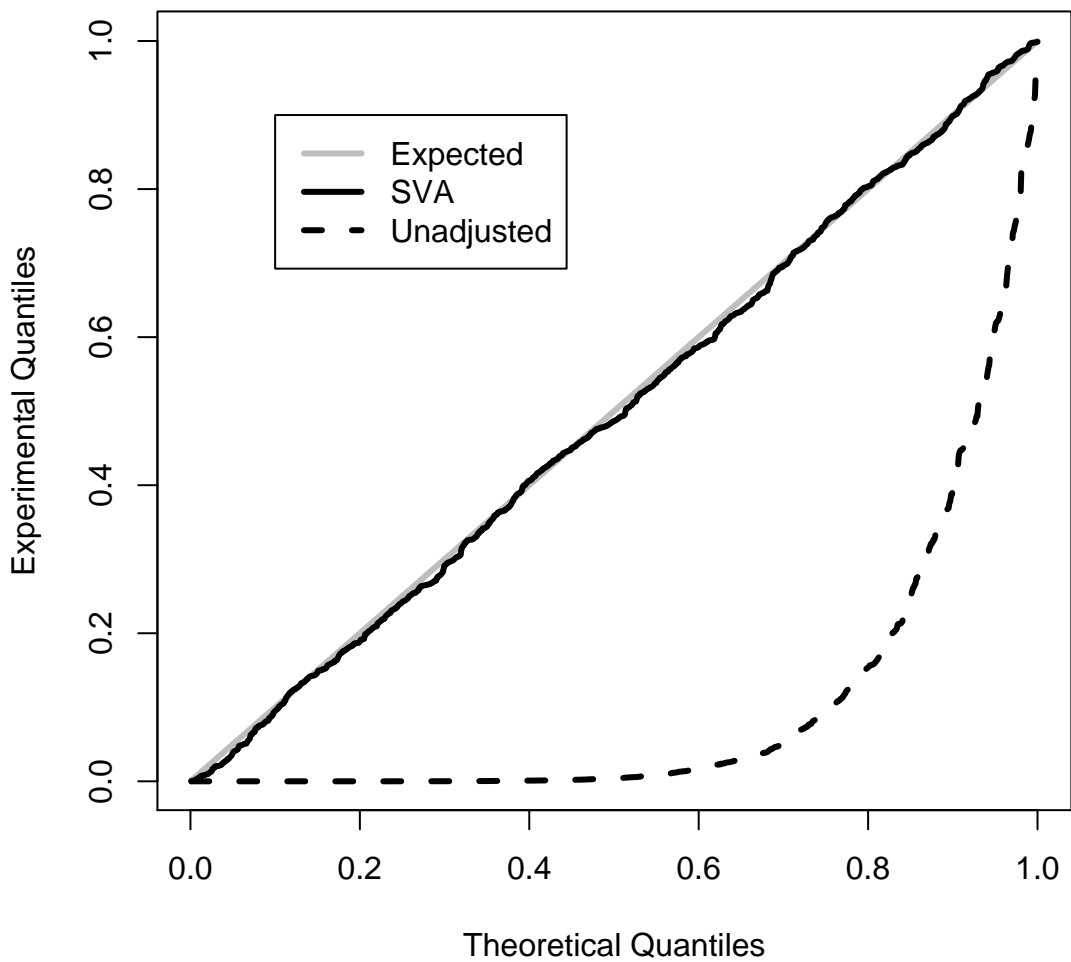

Supplement: pgen.0030161.sg004.pdf [file pgen.0030161.sg004.pdf]

**A**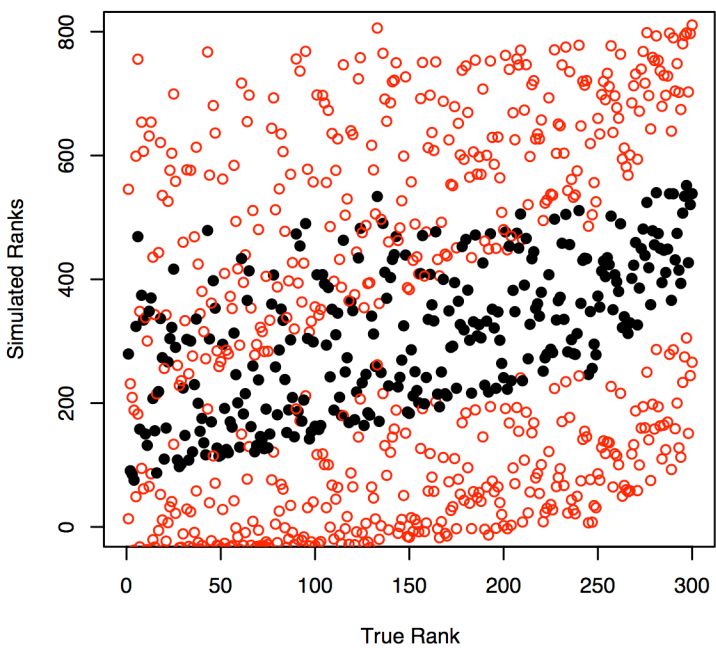**B**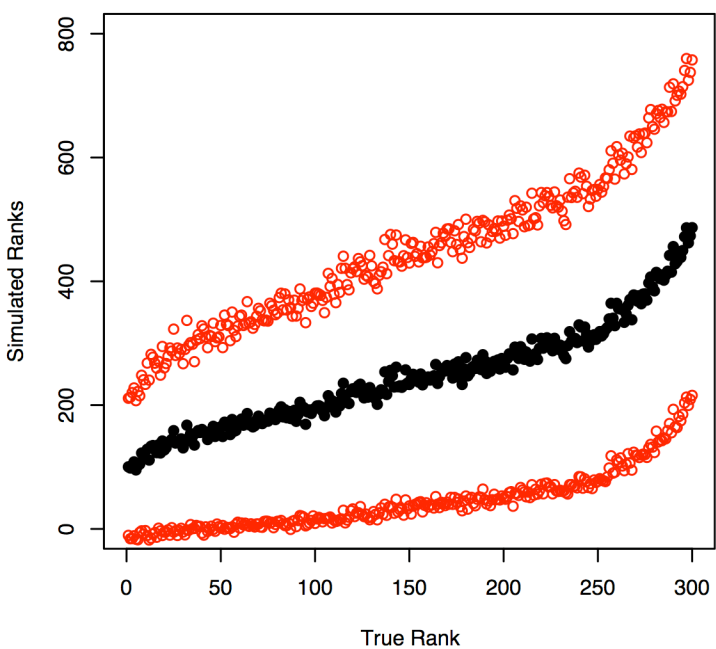**C**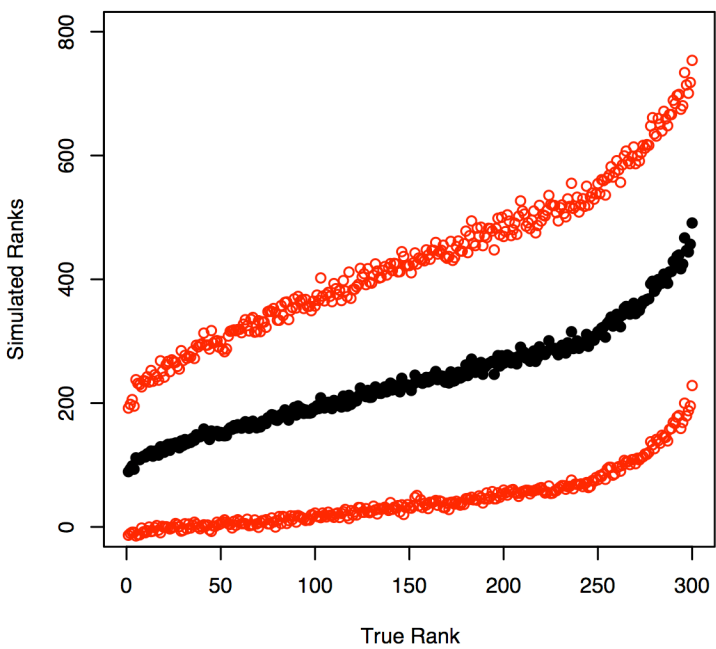

Supplement: pgen.0030161.sg005.pdf [file pgen.0030161.sg005.pdf]

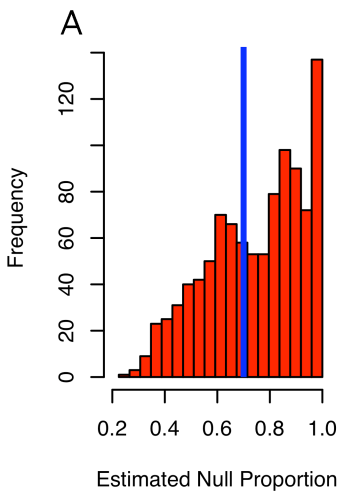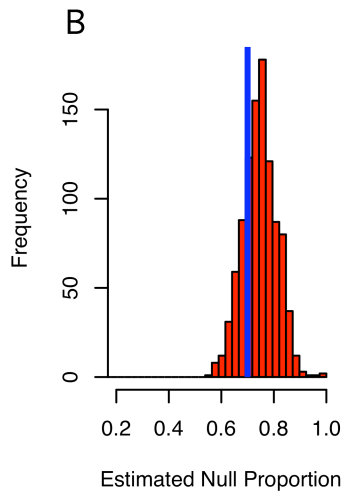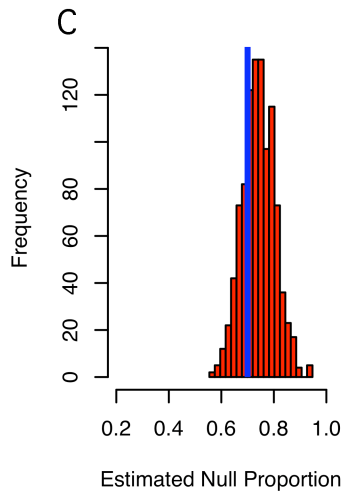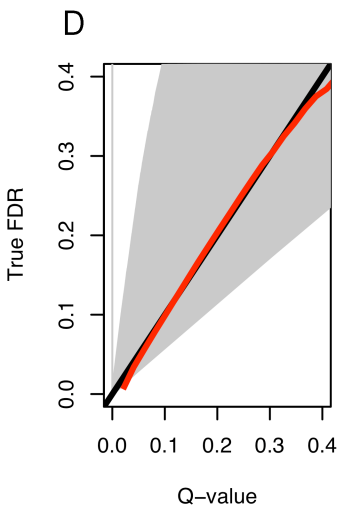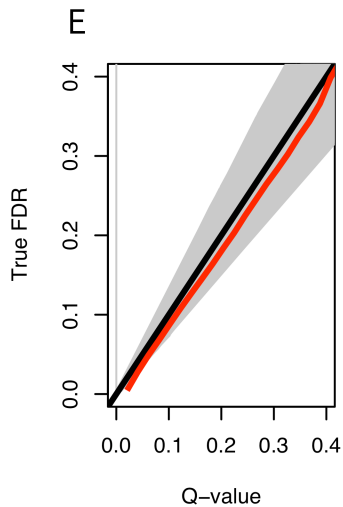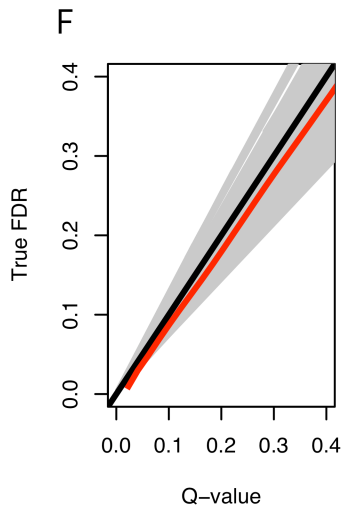

Supplement: pgen.0030161.sg006.pdf [file pgen.0030161.sg006.pdf]

**A**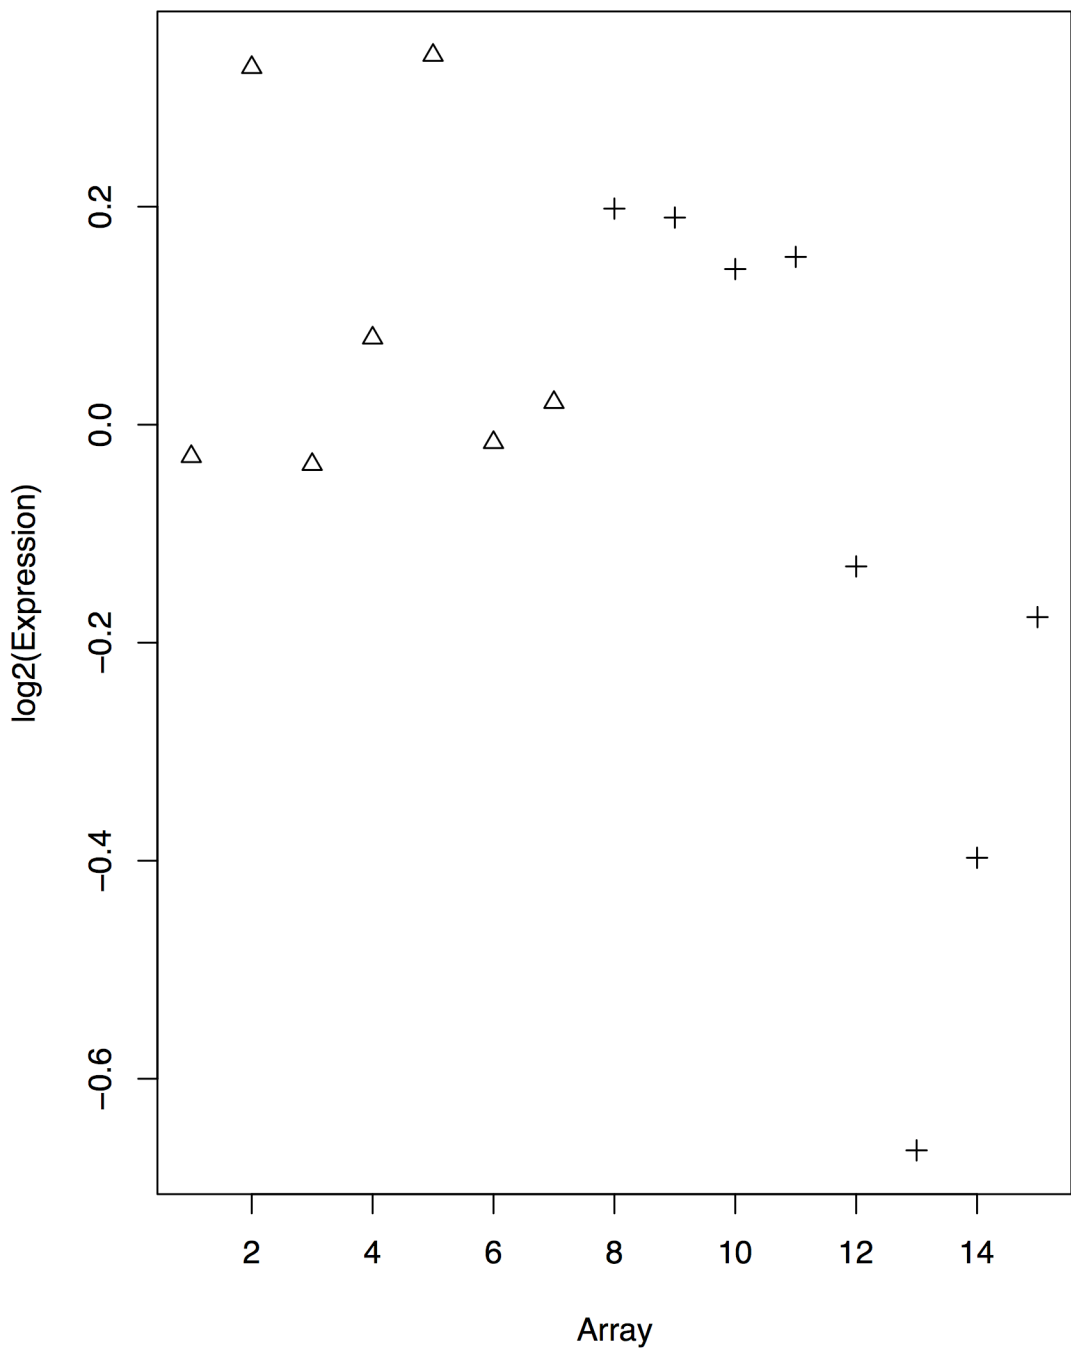**B**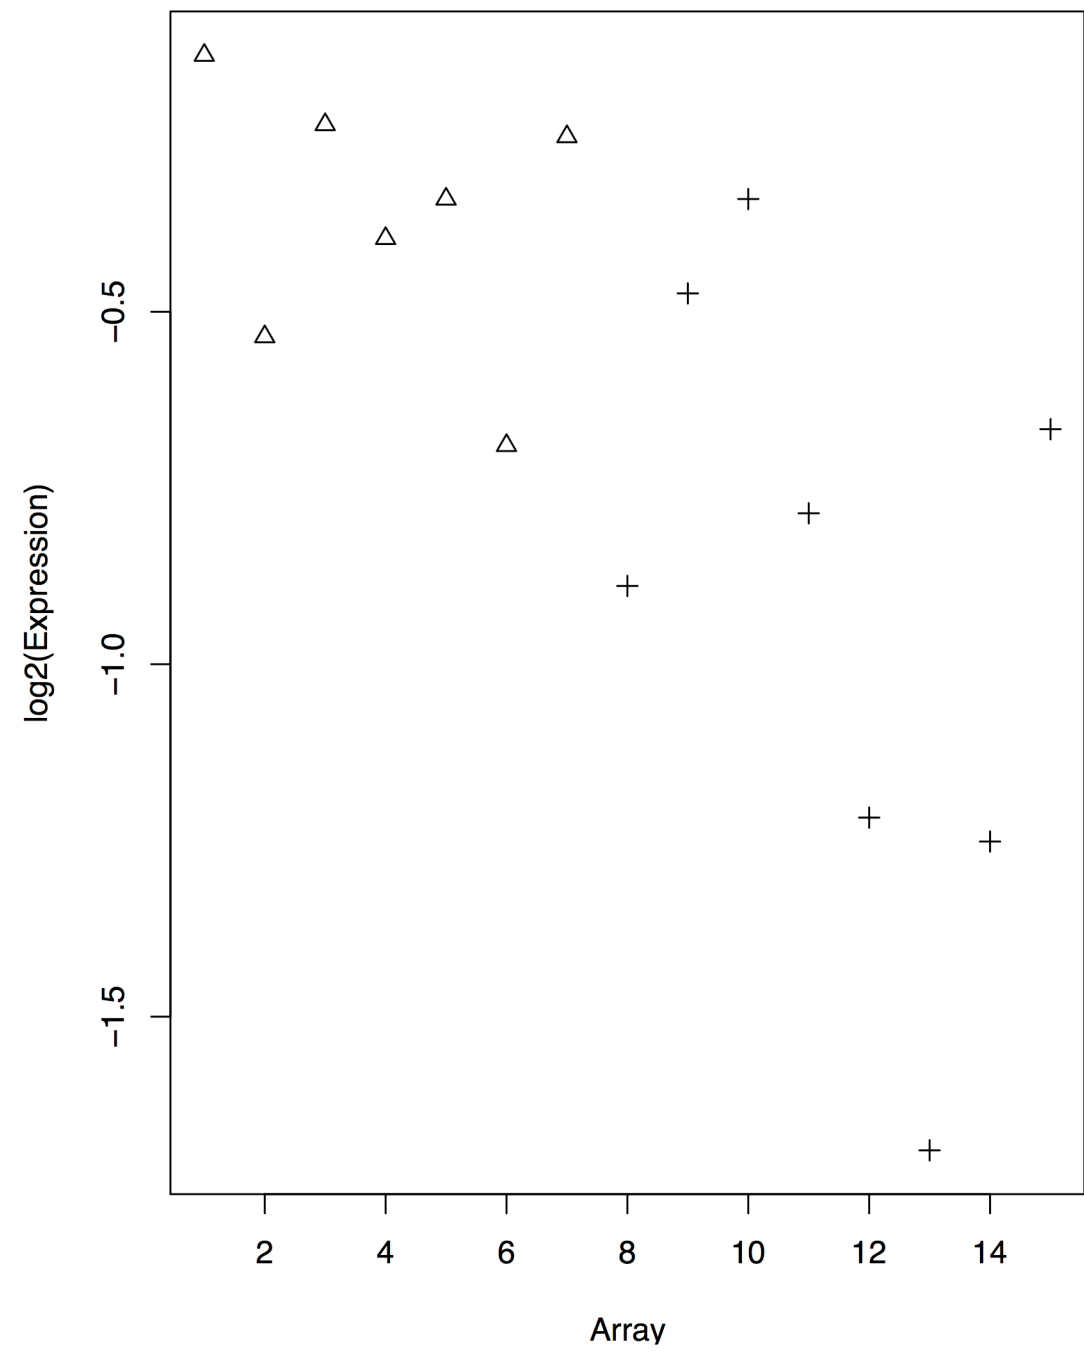

Supplement: pgen.0030161.sg007.pdf [file pgen.0030161.sg007.pdf]

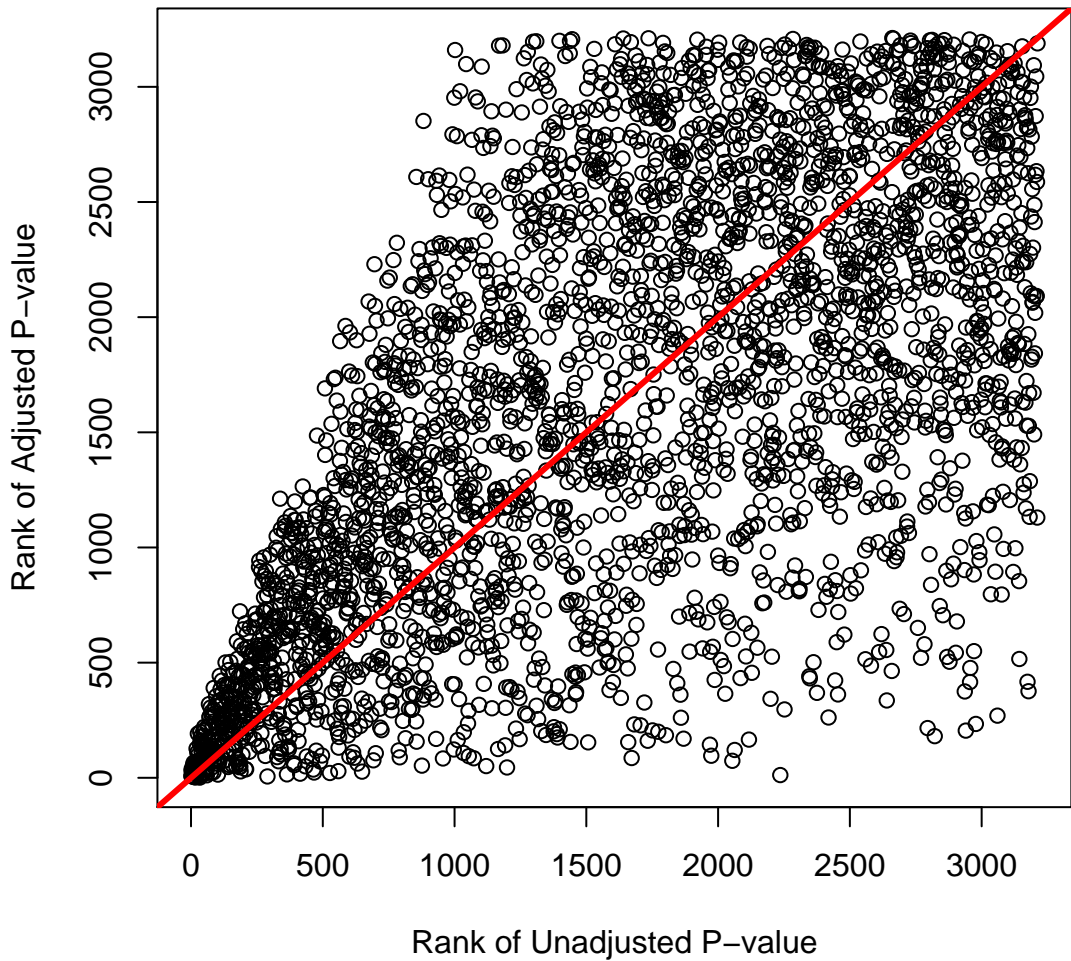

Supplement: pgen.0030161.sg008.pdf [file pgen.0030161.sg008.pdf]

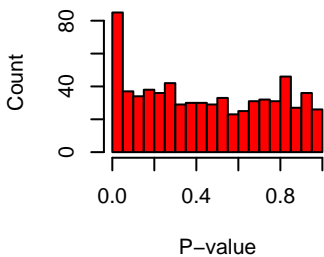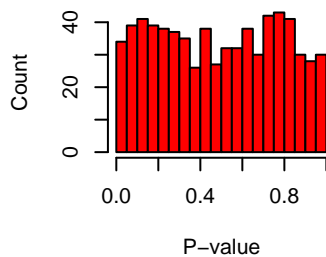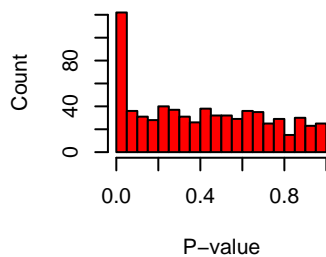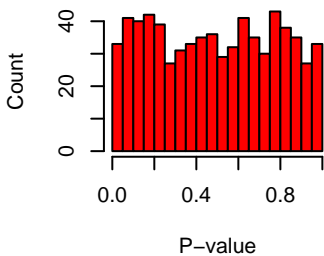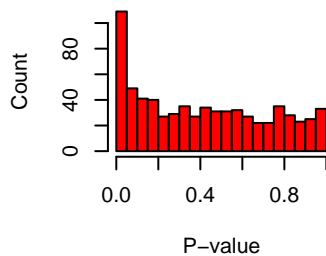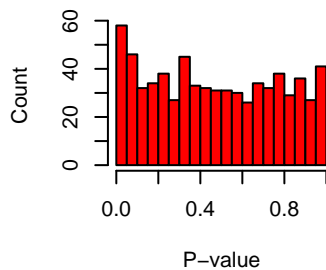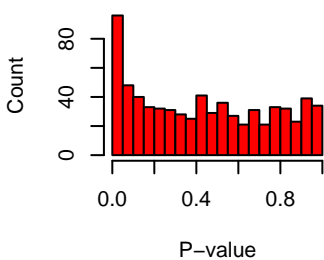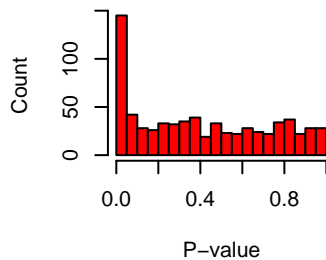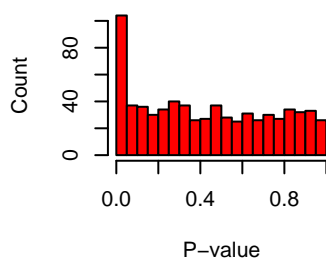

Supplement: pgen.0030161.sg009.pdf [file pgen.0030161.sg009.pdf]

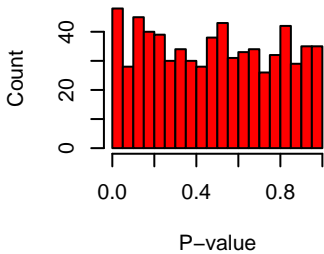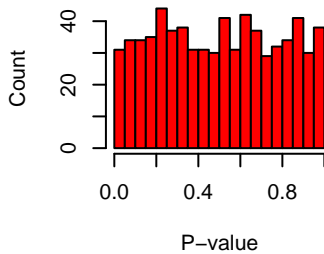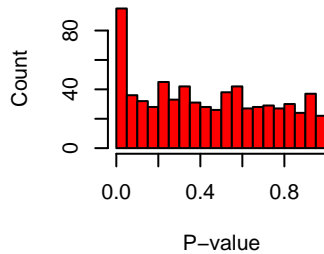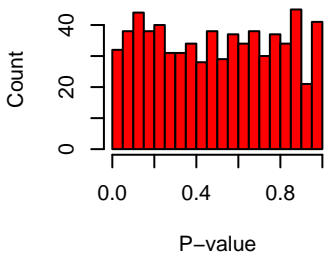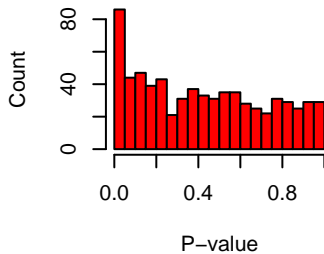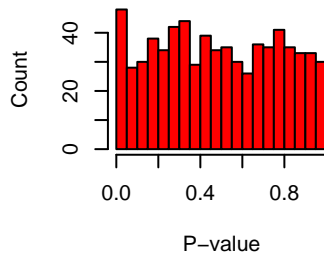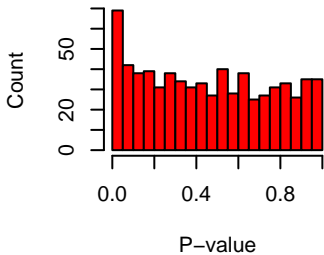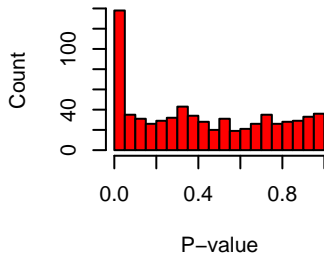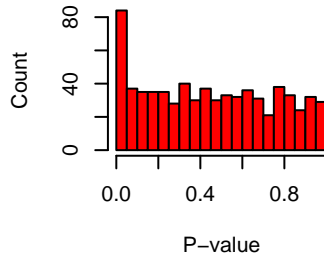

Supplement: pgen.0030161.sg010.pdf [file pgen.0030161.sg010.pdf]

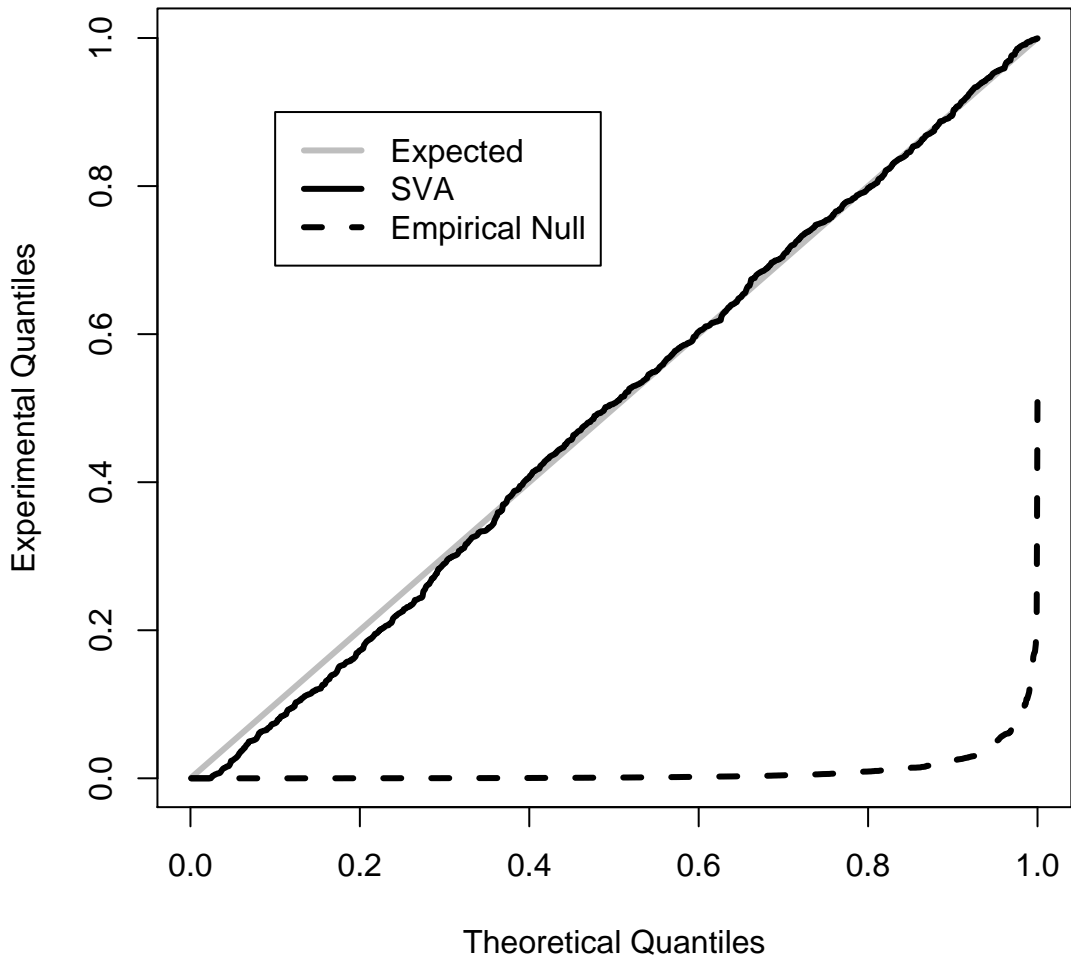

Supplement: pgen.0030161.sg011.pdf [file pgen.0030161.sg011.pdf]
